# Supplementary material for: SNX3-retromer requires an evolutionary conserved MON2:DOPEY2:ATP9A complex to mediate Wntless sorting and Wnt secretion
Source: PubMed Central journal article supplement (PMC6137200; doi:10.1038/s41467-018-06114-3), 2018-09-13

SNX3-retromer requires an evolutionary conserved MON2:DOPEY2:ATP9A complex to mediate Wntless sorting and Wnt secretion.

McGough et al., 2018

Supplementary Information

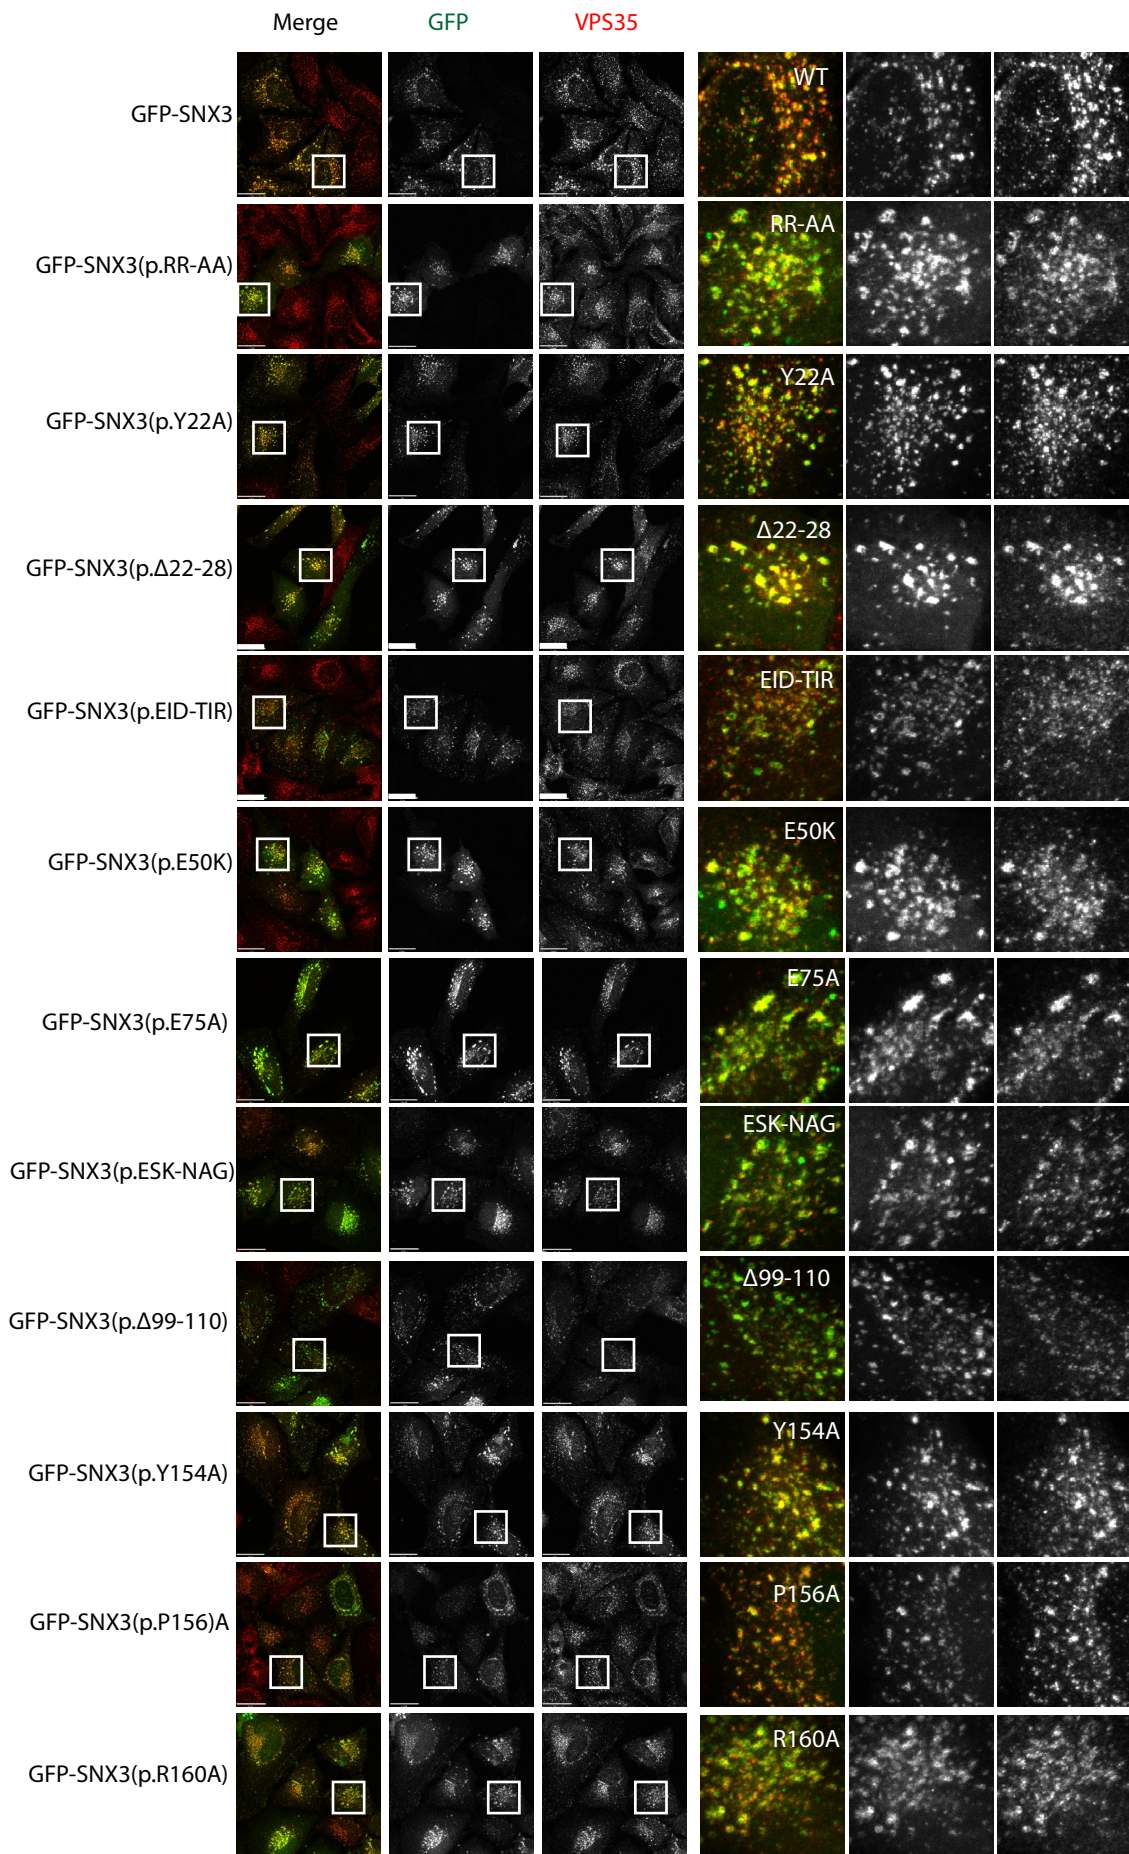

**Supplementary figure 1: Mutant GFP-SNX3 constructs localise to endosomes.**

Entire data set for Figure 1 C. Confocal images of HeLa cells transiently transfected to express wild type or mutated versions of GFP-SNX3 and subsequently stained for endogenous VPS26. Scale bar is 23  $\mu$ m.

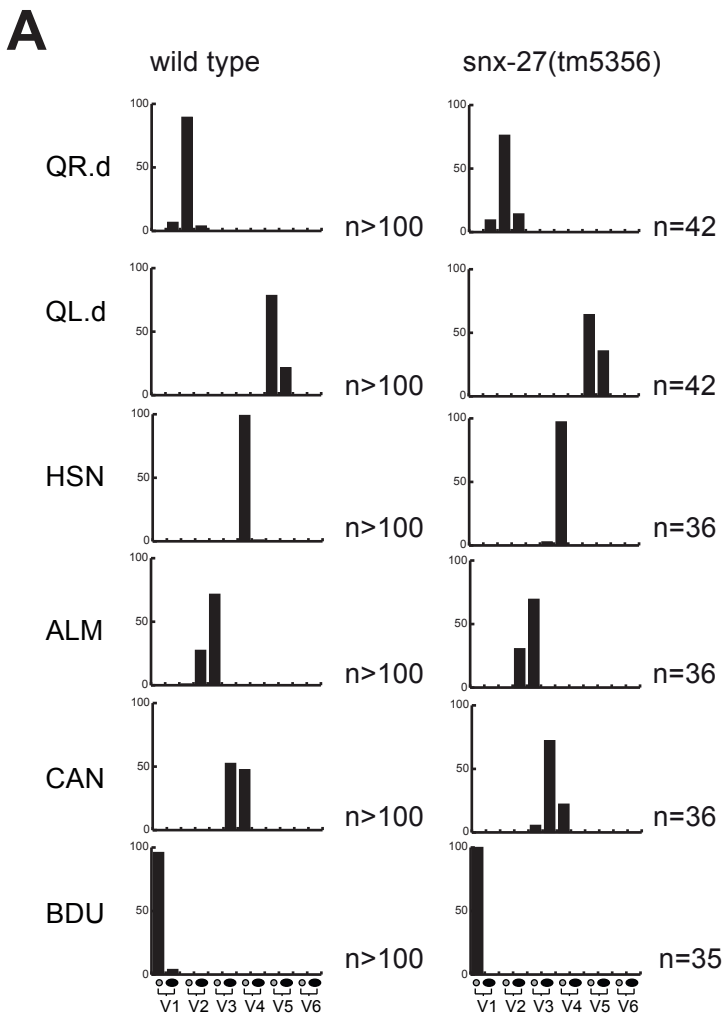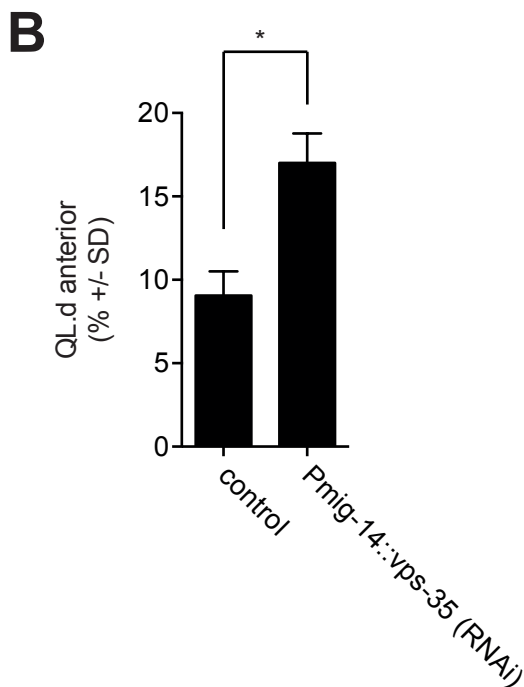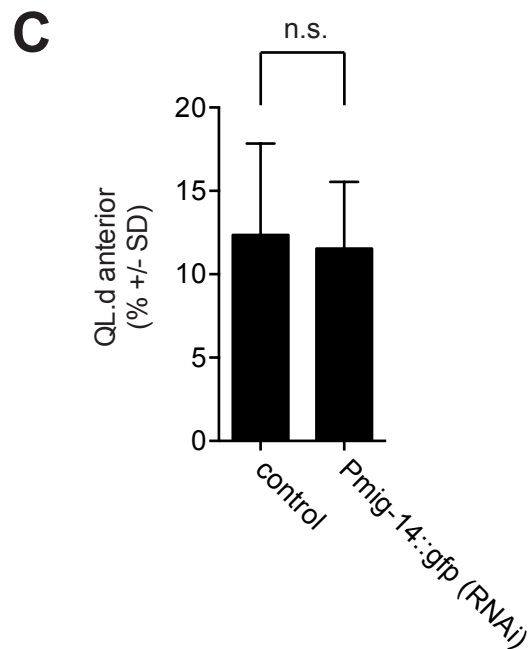

**Supplementary figure 2.**

**(A)** Loss of *snx-27* does not affect the Wnt dependent cell migration of the HSN, ALM, CAN, BDU neurons and the Q neuroblasts. **(B)** Knock down of *vps-35* in Wnt producing cells enhances the Wnt signaling phenotype (anterior localization of the QL.d) of *vps-29* mutants. **(C)** Expression of *gfp* double stranded RNA has no effect on Wnt signaling in the *vps-29* mutant background.

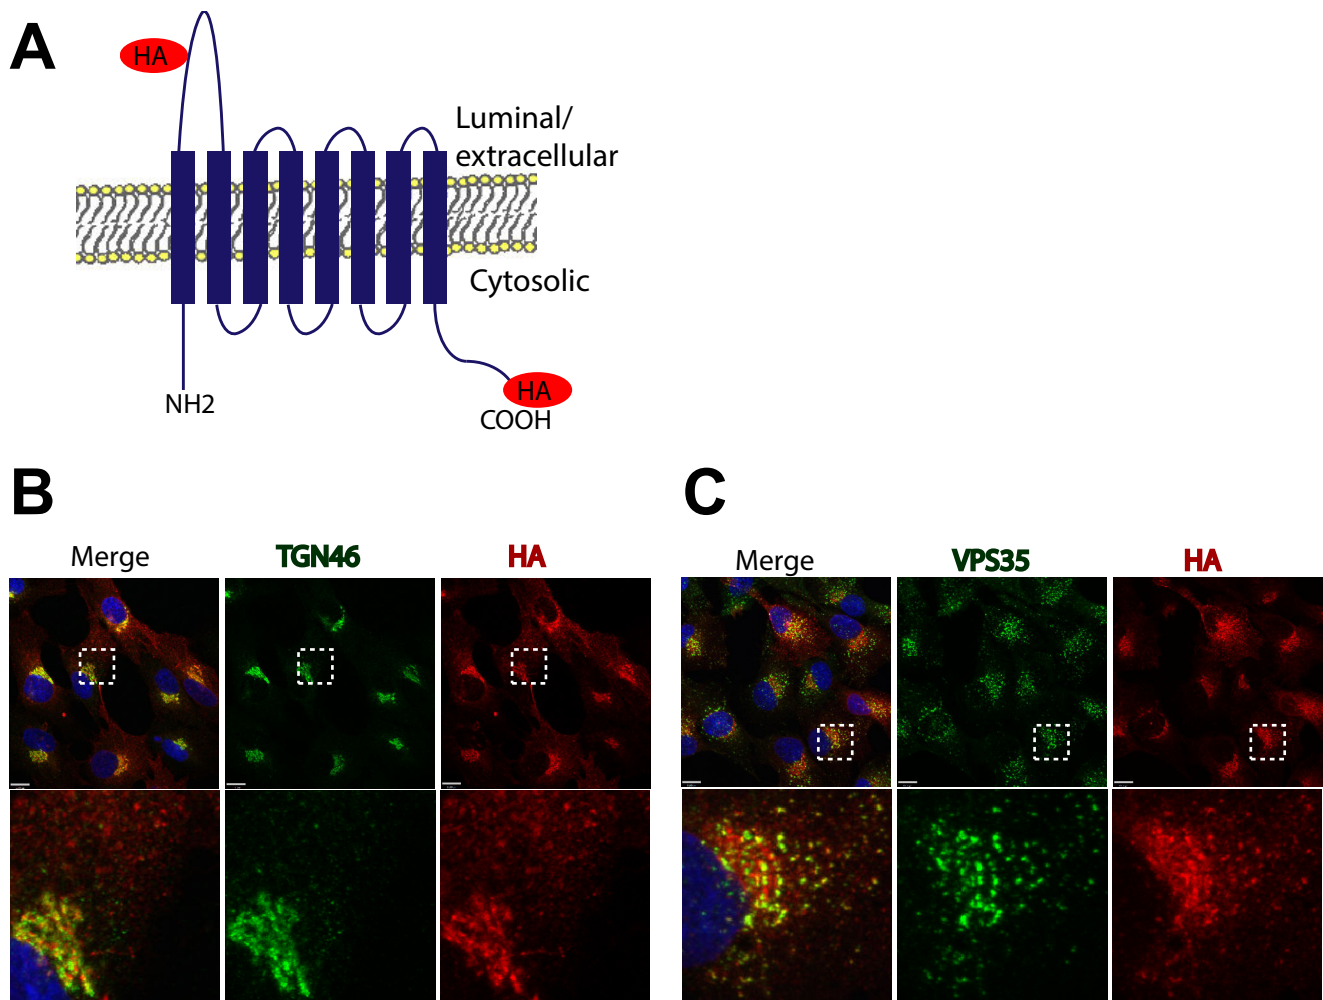

**Supplementary Figure 3: HA-WLS localises to the trans-golgi network and VPS35-positive endosomes**

**(A)** Schematic representation of the HA-WLS construct: two HA-tags are cloned onto Wntless, one on the luminal-facing and one on the cytosolic-facing side of the protein. **(B)** RPE-1 cells, stably expressing HA-WLS, were fixed and immuno-stained for HA and endogenous TGN46. The scale bar indicates 11  $\mu\text{m}$ . **(C)** RPE-1 cells, stably expressing HA-WLS, were fixed and immuno-stained for HA and endogenous VPS35. The scale bar indicates 11  $\mu\text{m}$ .

**Figure 1B**

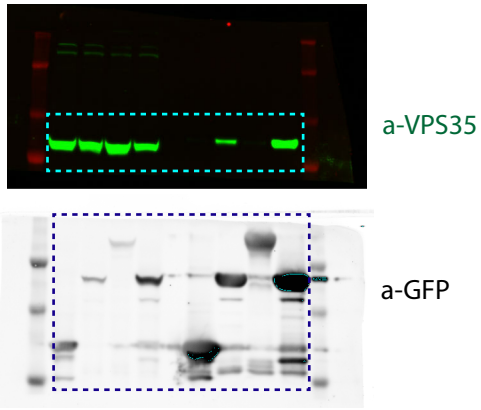

**Figure 1D**

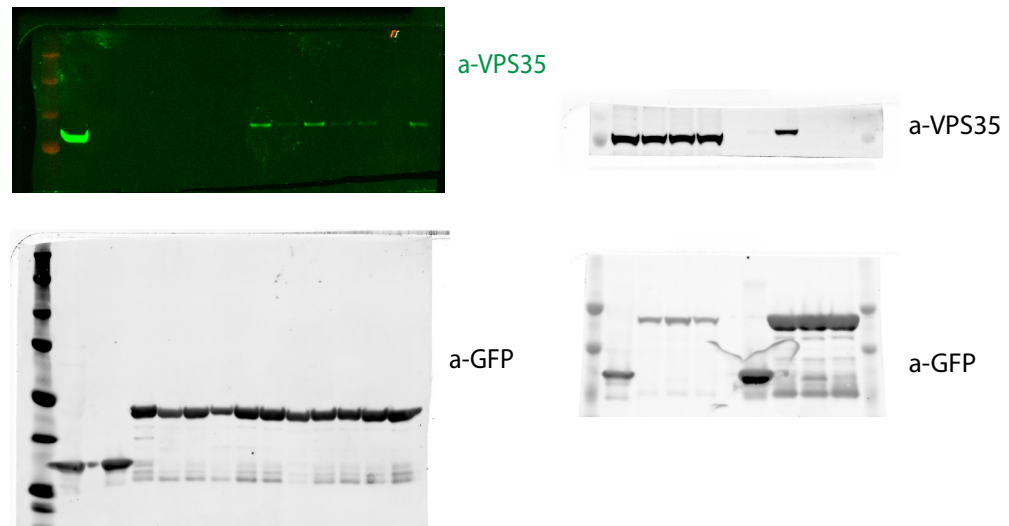

**Figure 2D**

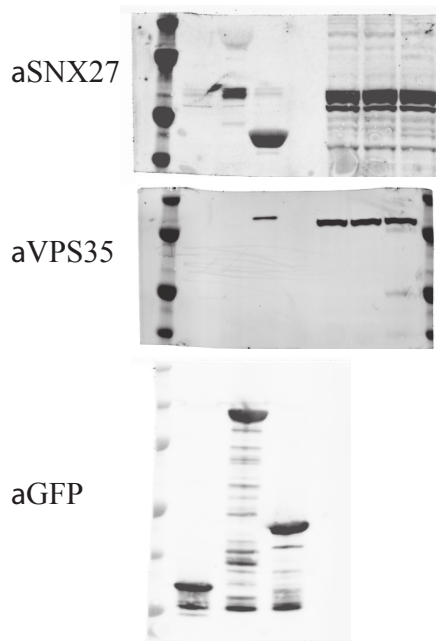

**Figure 2E**

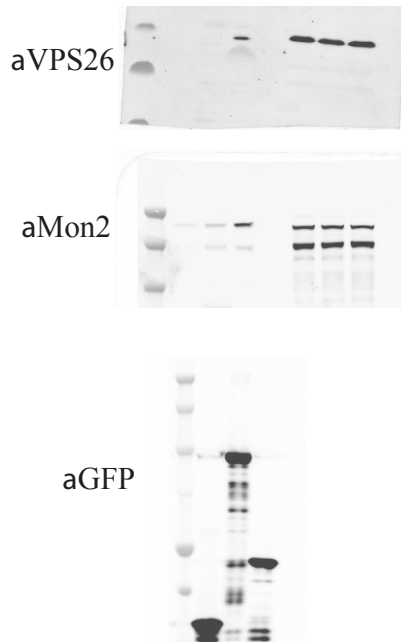

**Figure 2F**

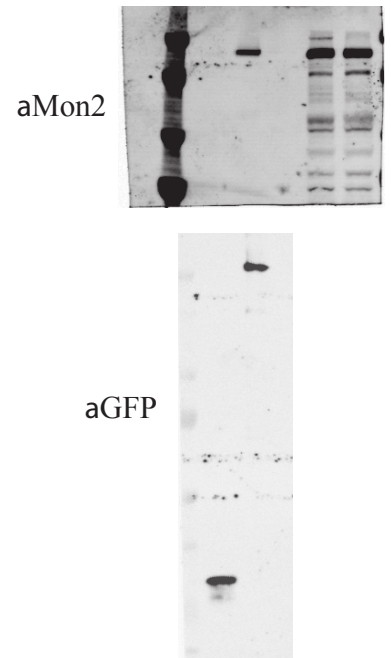

**Figure 2G**

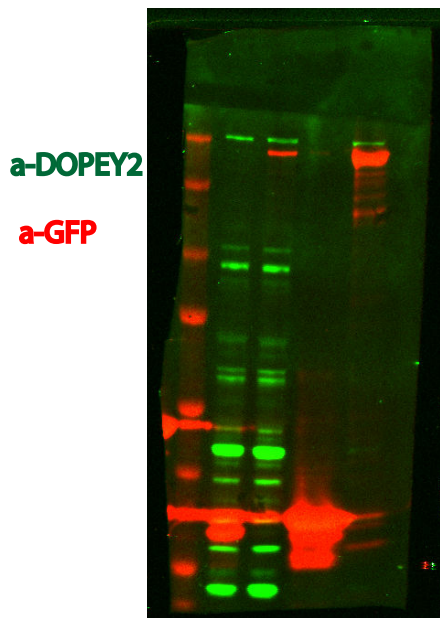

**Figure 2H**

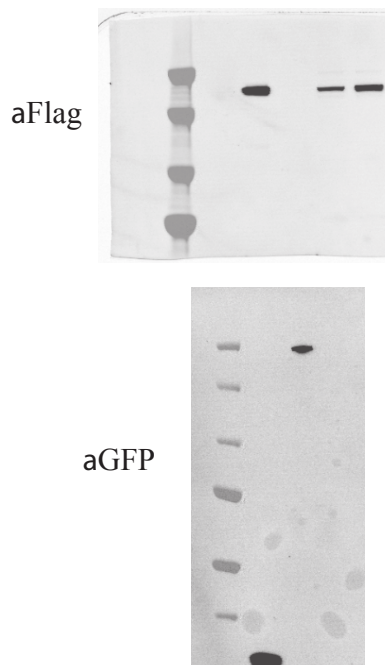

**Figure 2I**

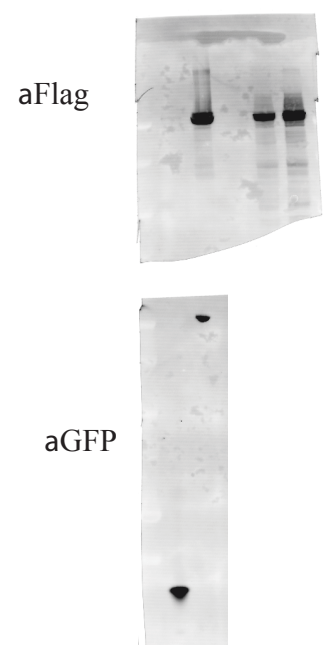

Supplementary Figure 4 (continued): Uncropped blots

Figure 2J

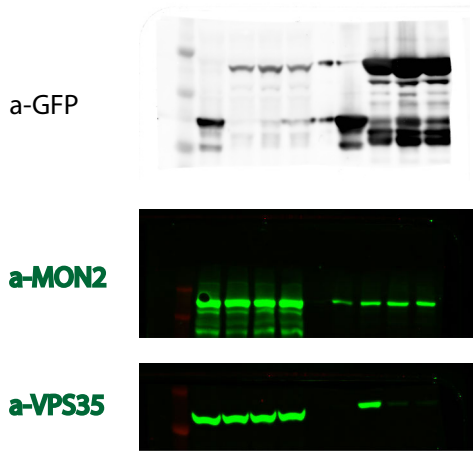

Figure 3A

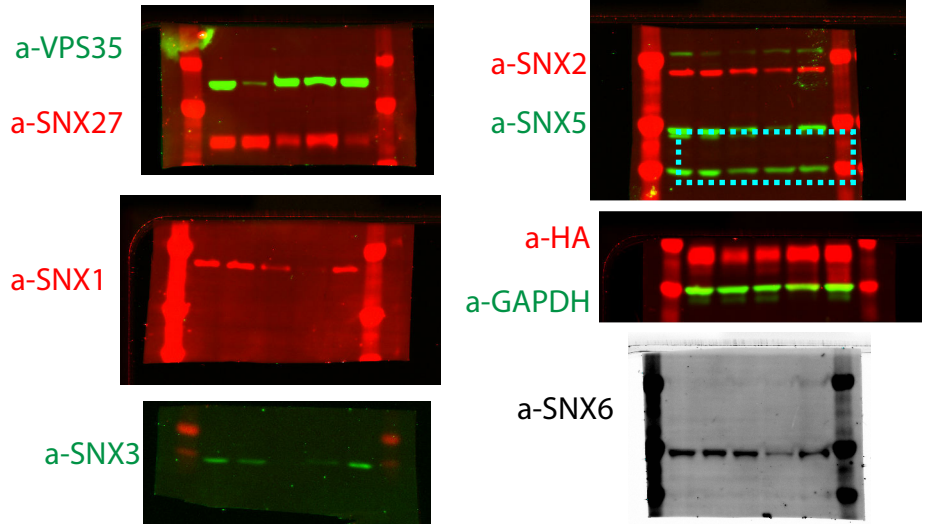

Figure 3B

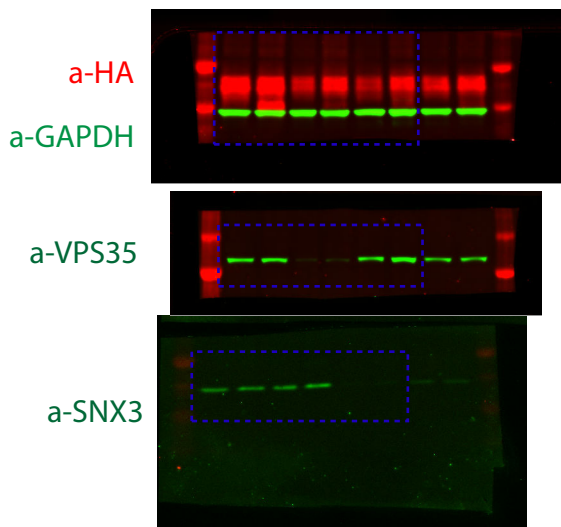

Figure 3C

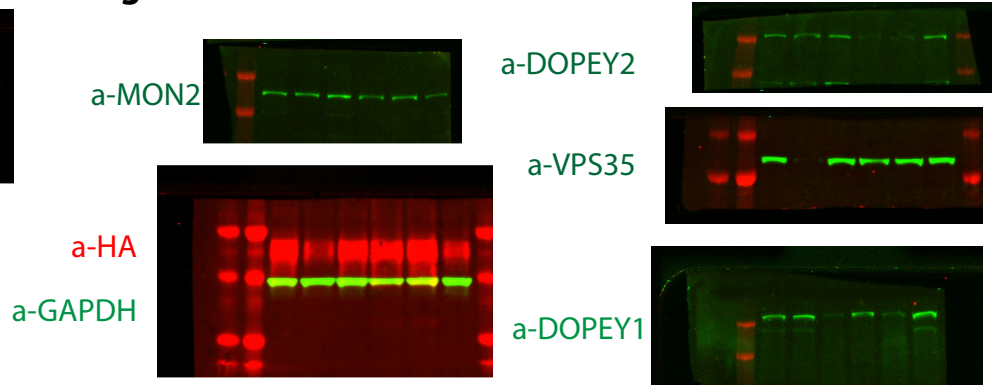

Figure 3D

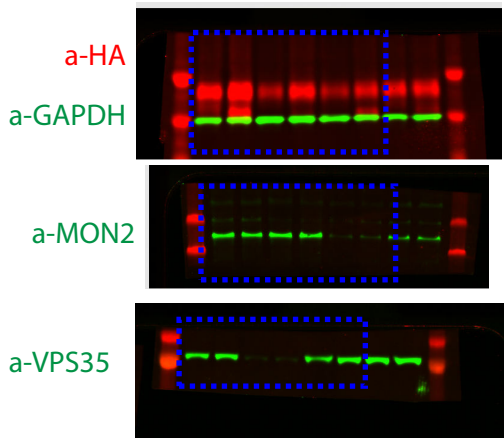

Figure 4H

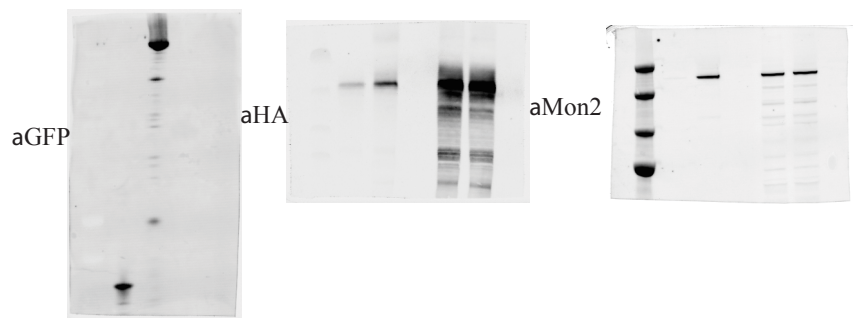

Figure 3E

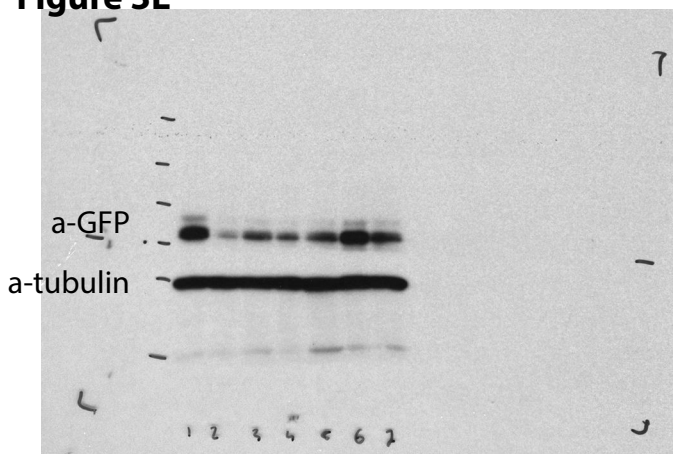

Figure 5A

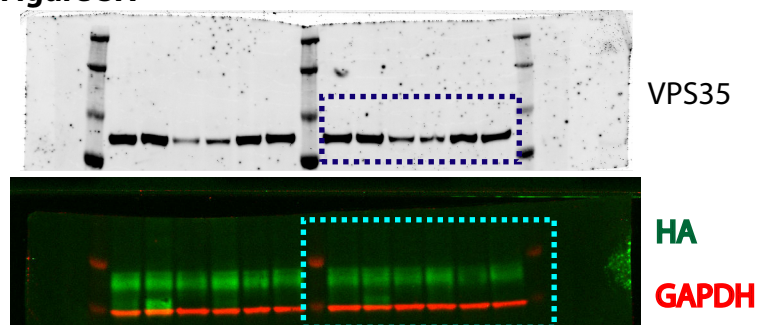

Supplement: 41467_2018_6114_MOESM1_ESM.pdf [file 41467_2018_6114_MOESM1_ESM.pdf]
